# Supplementary material
Source: publisher figshare collection journal article supplement (https://sage.figshare.com/ndownloader/files/22849508)
Supplement: Supplementary file 1 [file 22849508]

Appendix C

References Included in Review

Agosta, J. M. (1980). Treatment of self-injurious behavior through overcorrection procedures. *Journal of the Association for the Severely Handicapped, 5,* 5-12.

Altman, K., Haavik, S., & Cook, J. W. (1978). Punishment of self-injurious behavior in natural settings using contingent aromatic ammonia. *Behaviour Research and Therapy, 16,* 85-96.

Barnard, J. D., Christophersen, E. R., & Wolf, M. M. (1976). Parent-mediated treatment of children's self-injurious behavior using overcorrection. *Journal of Pediatric Psychology, 1,* 56-61.

Becker, J. V., Turner, S. M., & Sajwaj, T. E. (1978). Multiple behavioral effects of the use of lemon juice with a ruminating toddler-age child. *Behavior Modification, 2,* 267-278.

Briggson, S. (2014). *Decreasing stereotypy through response interruption and redirection (RIRD) and stimulus control* (Master’s thesis). Retrieved from <http://login.proxy.library.vanderbilt.edu/login?url=https://search.proquest.com/docview/1654781271?accountid=14816>

Cassella, M. D., Sidener, T. M., Sidener, D. W., & Progar, P. R. (2011). Response interruption and redirection for vocal stereotypy in children with autism: A systematic replication. *Journal of Applied Behavior Analysis, 44,* 169-173.

Donaldson, J. M., & Vollmer, T. R. (2011). An evaluation and comparison of time-out procedures with and without release contingencies. *Journal of Applied Behavior Analysis, 44,* 693-705.

Donaldson, J. M., Vollmer, T. R., Yakich, T. M., & Van Camp, C. (2013). Effects of a reduced time-out interval on compliance with the time-out instruction. *Journal of Applied Behavior Analysis, 46,* 369-378.

Doughty, S. S., Poe, S. G., & Anderson, C. M. (2005). Effects of punishment and response-independent attention on severe problem behavior and appropriate toy play. *Journal of Early and Intensive Behavior Intervention, 2,* 91-98.

Durand, M. V., & Carr, E. G. (1992). An analysis of maintenance following functional communication training. *Journal of Applied Behavior Analysis, 25,* 777-794.

Gross, A. M., Berler, E. S., & Drabman, R. S. (1982). Reduction of aggressive behavior in a retarded boy using a water squirt. *Journal of Behavior Therapy and Experimental Psychiatry, 13,* 95-98.

Luiselli, J. K., Ricciardi, J. N., Zubow, M., & Laster, K. (2004). Practice of an alternative behavior as intervention for object stereotypy: Comparison of contingent and noncontingent implementation across evoking stimuli. *The Behavior Analyst Today, 5,* 304-312.

Miguel, C. F., Clark, K., Tereshko, L., & Ahearn, W. H. (2009). The effects of response interruption and redirection and sertraline on vocal stereotypy. *Journal of Applied Behavior Analysis, 42*, 883-888.

Pendergrass, V. E. (1971). Effects of length of time-out from positive reinforcement and schedule of application in suppression of aggressive behavior. *The Psychological Record, 21,* 75-80.

Perry, T. L. (2013). *The effects of response interruption and redirection on language skills in children with vocal stereotypy* (Doctoral dissertation). Retrieved from <http://login.proxy.library.vanderbilt.edu/login?url=https://search.proquest.com/docview/1449311419?accountid=14816>

Rapoff, M. A., Altman, K., & Christophersen, E. R. (1980). Suppression of self-injurious

behaviour: Determining the least restrictive alternative. *Journal of Mental Deficiency Research, 24*, 37-46.

Salvy, S.-J., Mulick, J. A., Butter, E., Bartlett, R. K., & Linscheid, T. R. (2004). Contingent electric shock (SIBIS) and a conditioned punisher eliminate severe head banging in a preschool child. *Behavioral Interventions, 19,* 59-72.

Schumacher, B. I., & Rapp, J. T. (2011). Evaluation of the immediate and subsequent effects of response interruption and redirection on vocal stereotypy. *Journal of Applied Behavior Analysis, 44,* 681-685.

Swenson, C. R., & Simpson, R. L. (1978). *The effects and side-effects of overcorrection procedures for self-stimulatory behavior applied by parents of severely emotionally disturbed children in natural home settings* (Doctoral dissertation). Retrieved from <https://files.eric.ed.gov/fulltext/ED180151.pdf>

Van Houten, R., & Rolider, A. (1988). Recreating the scene: An effective way to provide delayed punishment for inappropriate motor behavior. *Journal of Applied Behavior Analysis, 21*, 187-192.

Wunderlich, K. L., & Vollmer, T. R. (2015). Data analysis of response interruption and redirection as a treatment for vocal stereotypy. *Journal of Applied Behavior Analysis, 48*, 749-764.

Wunderlich, K. L., Vollmer, T. R., & Zabala, K. A. (2017). Assessment and treatment of automatically reinforced self-induced emesis. *Journal of Applied Behavior Analysis, 50*, 418-423.
